# Supplementary material
Source: publisher figshare collection journal article supplement (https://acs.figshare.com/ndownloader/files/5677773)
Supplement: Supplementary file 1 [file 5677773]

HEADER    pb1701aPack                                             
REMARK   1 
REMARK   1          This file was generated by CrystalMaker  4.1.4    
REMARK   1    Real-time interactive crystallography software for MacOS
REMARK   1                               http://www.crystalmaker.co.uk
REMARK   1 
CRYST1   14.602   13.583    9.840  90.00  99.40  90.00               1
ATOM      1  C   MOL H   0     -16.494  12.845  25.006  1.00  0.00           C0 
ATOM      2  C   MOL H   0     -25.898  11.790  22.309  1.00  0.00           C0 
ATOM      3  C   MOL H   0     -17.831  26.348  24.385  1.00  0.00           C0 
ATOM      4  C   MOL H   0     -27.235  25.292  21.687  1.00  0.00           C0 
ATOM      5  C   MOL H   0     -16.304  19.348  17.449  1.00  0.00           C0 
ATOM      6  C   MOL H   0     -25.708  18.293  14.752  1.00  0.00           C0 
ATOM      7  C   MOL H   0     -17.641  32.851  16.828  1.00  0.00           C0 
ATOM      8  C   MOL H   0     -27.045  31.796  14.130  1.00  0.00           C0 
ATOM      9  C   MOL H   0     -22.599  26.485  23.005  1.00  0.00           C0 
ATOM     10  C   MOL H   0     -23.936  39.987  22.384  1.00  0.00           C0 
ATOM     11  C   MOL H   0     -21.072  19.485  16.070  1.00  0.00           C0 
ATOM     12  C   MOL H   0     -22.409  32.988  15.449  1.00  0.00           C0 
ATOM     13  C   MOL H   0     -16.026  14.955  25.047  1.00  0.00           C0 
ATOM     14  C   MOL H   0     -25.430  13.899  22.349  1.00  0.00           C0 
ATOM     15  C   MOL H   0     -17.363  28.458  24.426  1.00  0.00           C0 
ATOM     16  C   MOL H   0     -26.767  27.402  21.728  1.00  0.00           C0 
ATOM     17  C   MOL H   0     -15.836  21.458  17.490  1.00  0.00           C0 
ATOM     18  C   MOL H   0     -25.240  20.402  14.792  1.00  0.00           C0 
ATOM     19  C   MOL H   0     -17.173  34.961  16.869  1.00  0.00           C0 
ATOM     20  C   MOL H   0     -26.577  33.905  14.171  1.00  0.00           C0 
ATOM     21  C   MOL H   0     -17.365  14.810  24.778  1.00  0.00           C0 
ATOM     22  C   MOL H   0     -26.769  13.754  22.080  1.00  0.00           C0 
ATOM     23  C   MOL H   0     -18.703  28.313  24.157  1.00  0.00           C0 
ATOM     24  C   MOL H   0     -28.107  27.257  21.459  1.00  0.00           C0 
ATOM     25  C   MOL H   0     -17.175  21.313  17.221  1.00  0.00           C0 
ATOM     26  C   MOL H   0     -26.579  20.257  14.523  1.00  0.00           C0 
ATOM     27  C   MOL H   0     -18.513  34.816  16.600  1.00  0.00           C0 
ATOM     28  C   MOL H   0     -27.917  33.760  13.902  1.00  0.00           C0 
ATOM     29  C   MOL H   0     -23.067  24.375  22.965  1.00  0.00           C0 
ATOM     30  C   MOL H   0     -24.404  37.878  22.343  1.00  0.00           C0 
ATOM     31  C   MOL H   0     -21.540  17.375  16.029  1.00  0.00           C0 
ATOM     32  C   MOL H   0     -22.877  30.878  15.408  1.00  0.00           C0 
ATOM     33  C   MOL H   0     -21.727  24.520  23.234  1.00  0.00           C0 
ATOM     34  C   MOL H   0     -23.065  38.023  22.612  1.00  0.00           C0 
ATOM     35  C   MOL H   0     -20.200  17.520  16.298  1.00  0.00           C0 
ATOM     36  C   MOL H   0     -21.537  31.023  15.677  1.00  0.00           C0 
ATOM     37  C   MOL H   0     -15.151  16.142  25.267  1.00  0.00           C0 
ATOM     38  C   MOL H   0     -24.555  15.087  22.570  1.00  0.00           C0 
ATOM     39  C   MOL H   0     -16.488  29.645  24.646  1.00  0.00           C0 
ATOM     40  C   MOL H   0     -25.892  28.590  21.948  1.00  0.00           C0 
ATOM     41  C   MOL H   0     -14.961  22.645  17.710  1.00  0.00           C0 
ATOM     42  C   MOL H   0     -24.365  21.590  15.013  1.00  0.00           C0 
ATOM     43  C   MOL H   0     -16.298  36.148  17.089  1.00  0.00           C0 
ATOM     44  C   MOL H   0     -25.702  35.093  14.391  1.00  0.00           C0 
ATOM     45  C   MOL H   0     -18.454  15.778  24.459  1.00  0.00           C0 
ATOM     46  C   MOL H   0     -27.858  14.723  21.761  1.00  0.00           C0 
ATOM     47  C   MOL H   0     -19.791  29.281  23.837  1.00  0.00           C0 
ATOM     48  C   MOL H   0     -29.195  28.225  21.139  1.00  0.00           C0 
ATOM     49  C   MOL H   0     -18.264  22.281  16.902  1.00  0.00           C0 
ATOM     50  C   MOL H   0     -27.668  21.226  14.204  1.00  0.00           C0 
ATOM     51  C   MOL H   0     -19.601  35.784  16.280  1.00  0.00           C0 
ATOM     52  C   MOL H   0     -29.005  34.728  13.583  1.00  0.00           C0 
ATOM     53  C   MOL H   0     -23.942  23.187  22.744  1.00  0.00           C0 
ATOM     54  C   MOL H   0     -25.279  36.690  22.123  1.00  0.00           C0 
ATOM     55  C   MOL H   0     -22.414  16.187  15.809  1.00  0.00           C0 
ATOM     56  C   MOL H   0     -23.752  29.690  15.188  1.00  0.00           C0 
ATOM     57  C   MOL H   0     -20.639  23.552  23.553  1.00  0.00           C0 
ATOM     58  C   MOL H   0     -21.976  37.055  22.932  1.00  0.00           C0 
ATOM     59  C   MOL H   0     -19.112  16.552  16.618  1.00  0.00           C0 
ATOM     60  C   MOL H   0     -20.449  30.055  15.996  1.00  0.00           C0 
ATOM     61  C   MOL H   0     -15.884  17.152  23.109  1.00  0.00           C0 
ATOM     62  C   MOL H   0     -25.288  16.097  20.411  1.00  0.00           C0 
ATOM     63  C   MOL H   0     -17.221  30.655  22.487  1.00  0.00           C0 
ATOM     64  C   MOL H   0     -26.625  29.600  19.790  1.00  0.00           C0 
ATOM     65  C   MOL H   0     -15.694  23.655  15.552  1.00  0.00           C0 
ATOM     66  C   MOL H   0     -25.098  22.600  12.854  1.00  0.00           C0 
ATOM     67  C   MOL H   0     -17.031  37.158  14.931  1.00  0.00           C0 
ATOM     68  C   MOL H   0     -26.435  36.103  12.233  1.00  0.00           C0 
ATOM     69  C   MOL H   0     -17.952  17.104  26.510  1.00  0.00           C0 
ATOM     70  C   MOL H   0     -27.356  16.048  23.812  1.00  0.00           C0 
ATOM     71  C   MOL H   0     -19.289  30.607  25.888  1.00  0.00           C0 
ATOM     72  C   MOL H   0     -28.693  29.551  23.190  1.00  0.00           C0 
ATOM     73  C   MOL H   0     -17.762  23.607  18.953  1.00  0.00           C0 
ATOM     74  C   MOL H   0     -27.166  22.551  16.255  1.00  0.00           C0 
ATOM     75  C   MOL H   0     -19.099  37.110  18.331  1.00  0.00           C0 
ATOM     76  C   MOL H   0     -28.503  36.054  15.634  1.00  0.00           C0 
ATOM     77  C   MOL H   0     -23.209  22.177  24.903  1.00  0.00           C0 
ATOM     78  C   MOL H   0     -24.546  35.680  24.282  1.00  0.00           C0 
ATOM     79  C   MOL H   0     -21.681  15.178  17.968  1.00  0.00           C0 
ATOM     80  C   MOL H   0     -23.019  28.680  17.346  1.00  0.00           C0 
ATOM     81  C   MOL H   0     -21.141  22.226  21.502  1.00  0.00           C0 
ATOM     82  C   MOL H   0     -22.478  35.729  20.881  1.00  0.00           C0 
ATOM     83  C   MOL H   0     -19.613  15.226  14.567  1.00  0.00           C0 
ATOM     84  C   MOL H   0     -20.951  28.729  13.945  1.00  0.00           C0 
ATOM     85  C   MOL H   0     -14.635  18.463  24.793  1.00  0.00           C0 
ATOM     86  C   MOL H   0     -24.039  17.407  22.095  1.00  0.00           C0 
ATOM     87  C   MOL H   0     -15.972  31.966  24.171  1.00  0.00           C0 
ATOM     88  C   MOL H   0     -25.376  30.910  21.473  1.00  0.00           C0 
ATOM     89  C   MOL H   0     -14.445  24.966  17.236  1.00  0.00           C0 
ATOM     90  C   MOL H   0     -23.849  23.910  14.538  1.00  0.00           C0 
ATOM     91  C   MOL H   0     -15.782  38.469  16.614  1.00  0.00           C0 
ATOM     92  C   MOL H   0     -25.186  37.413  13.916  1.00  0.00           C0 
ATOM     93  C   MOL H   0     -19.418  17.986  24.725  1.00  0.00           C0 
ATOM     94  C   MOL H   0     -28.822  16.931  22.027  1.00  0.00           C0 
ATOM     95  C   MOL H   0     -20.756  31.489  24.104  1.00  0.00           C0 
ATOM     96  C   MOL H   0     -30.160  30.433  21.406  1.00  0.00           C0 
ATOM     97  C   MOL H   0     -19.228  24.489  17.168  1.00  0.00           C0 
ATOM     98  C   MOL H   0     -28.632  23.434  14.470  1.00  0.00           C0 
ATOM     99  C   MOL H   0     -20.566  37.992  16.547  1.00  0.00           C0 
ATOM    100  C   MOL H   0     -29.970  36.936  13.849  1.00  0.00           C0 
ATOM    101  C   MOL H   0     -24.458  20.867  23.219  1.00  0.00           C0 
ATOM    102  C   MOL H   0     -25.795  34.370  22.598  1.00  0.00           C0 
ATOM    103  C   MOL H   0     -22.931  13.867  16.284  1.00  0.00           C0 
ATOM    104  C   MOL H   0     -24.268  27.370  15.662  1.00  0.00           C0 
ATOM    105  C   MOL H   0     -19.674  21.344  23.287  1.00  0.00           C0 
ATOM    106  C   MOL H   0     -21.011  34.847  22.665  1.00  0.00           C0 
ATOM    107  C   MOL H   0     -18.147  14.344  16.351  1.00  0.00           C0 
ATOM    108  C   MOL H   0     -19.484  27.847  15.730  1.00  0.00           C0 
ATOM    109  C   MOL H   0     -13.374  18.733  24.009  1.00  0.00           C0 
ATOM    110  C   MOL H   0     -22.778  17.678  21.311  1.00  0.00           C0 
ATOM    111  C   MOL H   0     -14.711  32.236  23.388  1.00  0.00           C0 
ATOM    112  C   MOL H   0     -24.115  31.181  20.690  1.00  0.00           C0 
ATOM    113  C   MOL H   0     -13.184  25.236  16.452  1.00  0.00           C0 
ATOM    114  C   MOL H   0     -22.588  24.181  13.754  1.00  0.00           C0 
ATOM    115  C   MOL H   0     -14.521  38.739  15.831  1.00  0.00           C0 
ATOM    116  C   MOL H   0     -23.925  37.684  13.133  1.00  0.00           C0 
ATOM    117  C   MOL H   0     -20.714  18.074  25.492  1.00  0.00           C0 
ATOM    118  C   MOL H   0     -30.118  17.019  22.794  1.00  0.00           C0 
ATOM    119  C   MOL H   0     -22.052  31.577  24.871  1.00  0.00           C0 
ATOM    120  C   MOL H   0     -31.456  30.522  22.173  1.00  0.00           C0 
ATOM    121  C   MOL H   0     -20.525  24.577  17.935  1.00  0.00           C0 
ATOM    122  C   MOL H   0     -29.928  23.522  15.237  1.00  0.00           C0 
ATOM    123  C   MOL H   0     -21.862  38.080  17.314  1.00  0.00           C0 
ATOM    124  C   MOL H   0     -31.266  37.025  14.616  1.00  0.00           C0 
ATOM    125  C   MOL H   0     -25.718  20.596  24.003  1.00  0.00           C0 
ATOM    126  C   MOL H   0     -27.056  34.099  23.381  1.00  0.00           C0 
ATOM    127  C   MOL H   0     -24.191  13.597  17.067  1.00  0.00           C0 
ATOM    128  C   MOL H   0     -25.529  27.099  16.446  1.00  0.00           C0 
ATOM    129  C   MOL H   0     -18.378  21.255  22.520  1.00  0.00           C0 
ATOM    130  C   MOL H   0     -19.715  34.758  21.898  1.00  0.00           C0 
ATOM    131  C   MOL H   0     -16.851  14.255  15.584  1.00  0.00           C0 
ATOM    132  C   MOL H   0     -18.188  27.758  14.963  1.00  0.00           C0 
ATOM    133  C   MOL H   0     -13.320  19.733  23.064  1.00  0.00           C0 
ATOM    134  C   MOL H   0     -22.724  18.678  20.367  1.00  0.00           C0 
ATOM    135  C   MOL H   0     -14.657  33.236  22.443  1.00  0.00           C0 
ATOM    136  C   MOL H   0     -24.061  32.181  19.745  1.00  0.00           C0 
ATOM    137  C   MOL H   0     -13.130  26.236  15.507  1.00  0.00           C0 
ATOM    138  C   MOL H   0     -22.534  25.181  12.810  1.00  0.00           C0 
ATOM    139  C   MOL H   0     -14.467  39.739  14.886  1.00  0.00           C0 
ATOM    140  C   MOL H   0     -23.871  38.684  12.188  1.00  0.00           C0 
ATOM    141  C   MOL H   0     -20.972  19.126  26.342  1.00  0.00           C0 
ATOM    142  C   MOL H   0     -30.376  18.071  23.644  1.00  0.00           C0 
ATOM    143  C   MOL H   0     -22.309  32.629  25.721  1.00  0.00           C0 
ATOM    144  C   MOL H   0     -31.713  31.574  23.023  1.00  0.00           C0 
ATOM    145  C   MOL H   0     -20.782  25.629  18.785  1.00  0.00           C0 
ATOM    146  C   MOL H   0     -30.186  24.574  16.088  1.00  0.00           C0 
ATOM    147  C   MOL H   0     -22.119  39.132  18.164  1.00  0.00           C0 
ATOM    148  C   MOL H   0     -31.523  38.077  15.466  1.00  0.00           C0 
ATOM    149  C   MOL H   0     -25.773  19.596  24.947  1.00  0.00           C0 
ATOM    150  C   MOL H   0     -27.110  33.099  24.326  1.00  0.00           C0 
ATOM    151  C   MOL H   0     -24.245  12.596  18.012  1.00  0.00           C0 
ATOM    152  C   MOL H   0     -25.583  26.099  17.391  1.00  0.00           C0 
ATOM    153  C   MOL H   0     -18.121  20.203  21.670  1.00  0.00           C0 
ATOM    154  C   MOL H   0     -19.458  33.706  21.048  1.00  0.00           C0 
ATOM    155  C   MOL H   0     -16.593  13.203  14.734  1.00  0.00           C0 
ATOM    156  C   MOL H   0     -17.931  26.706  14.113  1.00  0.00           C0 
ATOM    157  C   MOL H   0     -12.165  19.963  22.331  1.00  0.00           C0 
ATOM    158  C   MOL H   0     -21.569  18.907  19.633  1.00  0.00           C0 
ATOM    159  C   MOL H   0     -13.503  33.465  21.710  1.00  0.00           C0 
ATOM    160  C   MOL H   0     -22.906  32.410  19.012  1.00  0.00           C0 
ATOM    161  C   MOL H   0     -11.975  26.466  14.774  1.00  0.00           C0 
ATOM    162  C   MOL H   0     -21.379  25.410  12.077  1.00  0.00           C0 
ATOM    163  C   MOL H   0     -13.313  39.969  14.153  1.00  0.00           C0 
ATOM    164  C   MOL H   0     -22.716  38.913  11.455  1.00  0.00           C0 
ATOM    165  C   MOL H   0     -22.156  19.191  27.062  1.00  0.00           C0 
ATOM    166  C   MOL H   0     -31.560  18.135  24.364  1.00  0.00           C0 
ATOM    167  C   MOL H   0     -23.493  32.694  26.440  1.00  0.00           C0 
ATOM    168  C   MOL H   0     -32.897  31.638  23.743  1.00  0.00           C0 
ATOM    169  C   MOL H   0     -21.966  25.694  19.505  1.00  0.00           C0 
ATOM    170  C   MOL H   0     -31.370  24.638  16.807  1.00  0.00           C0 
ATOM    171  C   MOL H   0     -23.303  39.197  18.884  1.00  0.00           C0 
ATOM    172  C   MOL H   0     -32.707  38.141  16.186  1.00  0.00           C0 
ATOM    173  C   MOL H   0     -26.927  19.367  25.681  1.00  0.00           C0 
ATOM    174  C   MOL H   0     -28.265  32.870  25.059  1.00  0.00           C0 
ATOM    175  C   MOL H   0     -25.400  12.367  18.745  1.00  0.00           C0 
ATOM    176  C   MOL H   0     -26.737  25.870  18.124  1.00  0.00           C0 
ATOM    177  C   MOL H   0     -16.937  20.139  20.950  1.00  0.00           C0 
ATOM    178  C   MOL H   0     -18.274  33.642  20.328  1.00  0.00           C0 
ATOM    179  C   MOL H   0     -15.410  13.139  14.014  1.00  0.00           C0 
ATOM    180  C   MOL H   0     -16.747  26.642  13.393  1.00  0.00           C0 
ATOM    181  C   MOL H   0     -11.052  19.198  22.560  1.00  0.00           C0 
ATOM    182  C   MOL H   0     -20.456  18.142  19.862  1.00  0.00           C0 
ATOM    183  C   MOL H   0     -12.389  32.700  21.938  1.00  0.00           C0 
ATOM    184  C   MOL H   0     -21.793  31.645  19.240  1.00  0.00           C0 
ATOM    185  C   MOL H   0     -10.862  25.701  15.003  1.00  0.00           C0 
ATOM    186  C   MOL H   0     -20.266  24.645  12.305  1.00  0.00           C0 
ATOM    187  C   MOL H   0     -12.199  39.203  14.381  1.00  0.00           C0 
ATOM    188  C   MOL H   0     -21.603  38.148  11.683  1.00  0.00           C0 
ATOM    189  C   MOL H   0     -23.096  18.205  26.914  1.00  0.00           C0 
ATOM    190  C   MOL H   0     -32.500  17.150  24.216  1.00  0.00           C0 
ATOM    191  C   MOL H   0     -24.433  31.708  26.293  1.00  0.00           C0 
ATOM    192  C   MOL H   0     -33.837  30.652  23.595  1.00  0.00           C0 
ATOM    193  C   MOL H   0     -22.906  24.708  19.357  1.00  0.00           C0 
ATOM    194  C   MOL H   0     -32.310  23.653  16.659  1.00  0.00           C0 
ATOM    195  C   MOL H   0     -24.243  38.211  18.736  1.00  0.00           C0 
ATOM    196  C   MOL H   0     -33.647  37.155  16.038  1.00  0.00           C0 
ATOM    197  C   MOL H   0     -28.041  20.132  25.452  1.00  0.00           C0 
ATOM    198  C   MOL H   0     -29.378  33.635  24.831  1.00  0.00           C0 
ATOM    199  C   MOL H   0     -26.514  13.132  18.517  1.00  0.00           C0 
ATOM    200  C   MOL H   0     -27.851  26.635  17.895  1.00  0.00           C0 
ATOM    201  C   MOL H   0     -15.997  21.125  21.098  1.00  0.00           C0 
ATOM    202  C   MOL H   0     -17.334  34.628  20.476  1.00  0.00           C0 
ATOM    203  C   MOL H   0     -14.469  14.125  14.162  1.00  0.00           C0 
ATOM    204  C   MOL H   0     -15.807  27.628  13.541  1.00  0.00           C0 
ATOM    205  C   MOL H   0     -11.090  18.211  23.513  1.00  0.00           C0 
ATOM    206  C   MOL H   0     -20.494  17.156  20.815  1.00  0.00           C0 
ATOM    207  C   MOL H   0     -12.427  31.714  22.892  1.00  0.00           C0 
ATOM    208  C   MOL H   0     -21.831  30.659  20.194  1.00  0.00           C0 
ATOM    209  C   MOL H   0     -10.900  24.714  15.956  1.00  0.00           C0 
ATOM    210  C   MOL H   0     -20.304  23.659  13.258  1.00  0.00           C0 
ATOM    211  C   MOL H   0     -12.237  38.217  15.335  1.00  0.00           C0 
ATOM    212  C   MOL H   0     -21.641  37.162  12.637  1.00  0.00           C0 
ATOM    213  C   MOL H   0     -22.857  17.163  26.054  1.00  0.00           C0 
ATOM    214  C   MOL H   0     -32.261  16.107  23.356  1.00  0.00           C0 
ATOM    215  C   MOL H   0     -24.194  30.666  25.433  1.00  0.00           C0 
ATOM    216  C   MOL H   0     -33.598  29.610  22.735  1.00  0.00           C0 
ATOM    217  C   MOL H   0     -22.667  23.666  18.497  1.00  0.00           C0 
ATOM    218  C   MOL H   0     -32.071  22.610  15.799  1.00  0.00           C0 
ATOM    219  C   MOL H   0     -24.004  37.169  17.876  1.00  0.00           C0 
ATOM    220  C   MOL H   0     -33.408  36.113  15.178  1.00  0.00           C0 
ATOM    221  C   MOL H   0     -28.003  21.118  24.499  1.00  0.00           C0 
ATOM    222  C   MOL H   0     -29.340  34.621  23.877  1.00  0.00           C0 
ATOM    223  C   MOL H   0     -26.476  14.118  17.563  1.00  0.00           C0 
ATOM    224  C   MOL H   0     -27.813  27.621  16.942  1.00  0.00           C0 
ATOM    225  C   MOL H   0     -16.236  22.167  21.958  1.00  0.00           C0 
ATOM    226  C   MOL H   0     -17.573  35.670  21.336  1.00  0.00           C0 
ATOM    227  C   MOL H   0     -14.708  15.167  15.022  1.00  0.00           C0 
ATOM    228  C   MOL H   0     -16.046  28.670  14.401  1.00  0.00           C0 
ATOM    229  C   MOL H   0     -12.239  17.975  24.232  1.00  0.00           C0 
ATOM    230  C   MOL H   0     -21.643  16.920  21.534  1.00  0.00           C0 
ATOM    231  C   MOL H   0     -13.576  31.478  23.611  1.00  0.00           C0 
ATOM    232  C   MOL H   0     -22.980  30.423  20.913  1.00  0.00           C0 
ATOM    233  C   MOL H   0     -12.049  24.478  16.675  1.00  0.00           C0 
ATOM    234  C   MOL H   0     -21.453  23.423  13.978  1.00  0.00           C0 
ATOM    235  C   MOL H   0     -13.386  37.981  16.054  1.00  0.00           C0 
ATOM    236  C   MOL H   0     -22.790  36.926  13.356  1.00  0.00           C0 
ATOM    237  C   MOL H   0     -21.677  17.092  25.349  1.00  0.00           C0 
ATOM    238  C   MOL H   0     -31.081  16.036  22.651  1.00  0.00           C0 
ATOM    239  C   MOL H   0     -23.015  30.595  24.728  1.00  0.00           C0 
ATOM    240  C   MOL H   0     -32.419  29.539  22.030  1.00  0.00           C0 
ATOM    241  C   MOL H   0     -21.487  23.595  17.792  1.00  0.00           C0 
ATOM    242  C   MOL H   0     -30.891  22.539  15.094  1.00  0.00           C0 
ATOM    243  C   MOL H   0     -22.825  37.098  17.171  1.00  0.00           C0 
ATOM    244  C   MOL H   0     -32.229  36.042  14.473  1.00  0.00           C0 
ATOM    245  C   MOL H   0     -26.854  21.355  23.780  1.00  0.00           C0 
ATOM    246  C   MOL H   0     -28.191  34.857  23.158  1.00  0.00           C0 
ATOM    247  C   MOL H   0     -25.327  14.355  16.844  1.00  0.00           C0 
ATOM    248  C   MOL H   0     -26.664  27.858  16.223  1.00  0.00           C0 
ATOM    249  C   MOL H   0     -17.415  22.238  22.663  1.00  0.00           C0 
ATOM    250  C   MOL H   0     -18.752  35.741  22.041  1.00  0.00           C0 
ATOM    251  C   MOL H   0     -15.888  15.238  15.727  1.00  0.00           C0 
ATOM    252  C   MOL H   0     -17.225  28.741  15.106  1.00  0.00           C0 
ATOM    253  H   MOL H   0     -16.399  11.892  25.050  1.00  0.00           H0 
ATOM    254  H   MOL H   0     -25.803  10.836  22.352  1.00  0.00           H0 
ATOM    255  H   MOL H   0     -17.737  25.395  24.429  1.00  0.00           H0 
ATOM    256  H   MOL H   0     -27.141  24.339  21.731  1.00  0.00           H0 
ATOM    257  H   MOL H   0     -16.209  18.395  17.493  1.00  0.00           H0 
ATOM    258  H   MOL H   0     -25.613  17.339  14.796  1.00  0.00           H0 
ATOM    259  H   MOL H   0     -17.547  31.898  16.872  1.00  0.00           H0 
ATOM    260  H   MOL H   0     -26.951  30.842  14.174  1.00  0.00           H0 
ATOM    261  H   MOL H   0     -22.693  27.438  22.962  1.00  0.00           H0 
ATOM    262  H   MOL H   0     -24.031  40.941  22.340  1.00  0.00           H0 
ATOM    263  H   MOL H   0     -21.166  20.438  16.026  1.00  0.00           H0 
ATOM    264  H   MOL H   0     -22.503  33.941  15.405  1.00  0.00           H0 
ATOM    265  H   MOL H   0     -14.565  13.577  25.428  1.00  0.00           H0 
ATOM    266  H   MOL H   0     -23.969  12.522  22.730  1.00  0.00           H0 
ATOM    267  H   MOL H   0     -15.903  27.080  24.806  1.00  0.00           H0 
ATOM    268  H   MOL H   0     -25.307  26.025  22.108  1.00  0.00           H0 
ATOM    269  H   MOL H   0     -14.375  20.080  17.871  1.00  0.00           H0 
ATOM    270  H   MOL H   0     -23.779  19.025  15.173  1.00  0.00           H0 
ATOM    271  H   MOL H   0     -15.713  33.583  17.249  1.00  0.00           H0 
ATOM    272  H   MOL H   0     -25.117  32.528  14.552  1.00  0.00           H0 
ATOM    273  H   MOL H   0     -18.524  13.144  24.538  1.00  0.00           H0 
ATOM    274  H   MOL H   0     -27.928  12.089  21.840  1.00  0.00           H0 
ATOM    275  H   MOL H   0     -19.862  26.647  23.916  1.00  0.00           H0 
ATOM    276  H   MOL H   0     -29.266  25.592  21.218  1.00  0.00           H0 
ATOM    277  H   MOL H   0     -18.334  19.647  16.981  1.00  0.00           H0 
ATOM    278  H   MOL H   0     -27.738  18.592  14.283  1.00  0.00           H0 
ATOM    279  H   MOL H   0     -19.672  33.150  16.359  1.00  0.00           H0 
ATOM    280  H   MOL H   0     -29.076  32.095  13.662  1.00  0.00           H0 
ATOM    281  H   MOL H   0     -24.527  25.752  22.584  1.00  0.00           H0 
ATOM    282  H   MOL H   0     -25.865  39.255  21.963  1.00  0.00           H0 
ATOM    283  H   MOL H   0     -23.000  18.752  15.649  1.00  0.00           H0 
ATOM    284  H   MOL H   0     -24.337  32.255  15.027  1.00  0.00           H0 
ATOM    285  H   MOL H   0     -20.568  26.185  23.474  1.00  0.00           H0 
ATOM    286  H   MOL H   0     -21.906  39.688  22.853  1.00  0.00           H0 
ATOM    287  H   MOL H   0     -19.041  19.185  16.539  1.00  0.00           H0 
ATOM    288  H   MOL H   0     -20.378  32.688  15.917  1.00  0.00           H0 
ATOM    289  H   MOL H   0     -16.281  16.289  22.965  1.00  0.00           H0 
ATOM    290  H   MOL H   0     -25.684  15.234  20.268  1.00  0.00           H0 
ATOM    291  H   MOL H   0     -17.618  29.792  22.344  1.00  0.00           H0 
ATOM    292  H   MOL H   0     -27.022  28.737  19.646  1.00  0.00           H0 
ATOM    293  H   MOL H   0     -16.091  22.792  15.408  1.00  0.00           H0 
ATOM    294  H   MOL H   0     -25.495  21.737  12.711  1.00  0.00           H0 
ATOM    295  H   MOL H   0     -17.428  36.295  14.787  1.00  0.00           H0 
ATOM    296  H   MOL H   0     -26.832  35.240  12.089  1.00  0.00           H0 
ATOM    297  H   MOL H   0     -17.395  16.352  26.727  1.00  0.00           H0 
ATOM    298  H   MOL H   0     -26.799  15.297  24.030  1.00  0.00           H0 
ATOM    299  H   MOL H   0     -18.733  29.855  26.106  1.00  0.00           H0 
ATOM    300  H   MOL H   0     -28.137  28.799  23.408  1.00  0.00           H0 
ATOM    301  H   MOL H   0     -17.205  22.855  19.171  1.00  0.00           H0 
ATOM    302  H   MOL H   0     -26.609  21.800  16.473  1.00  0.00           H0 
ATOM    303  H   MOL H   0     -18.543  36.358  18.549  1.00  0.00           H0 
ATOM    304  H   MOL H   0     -27.947  35.303  15.851  1.00  0.00           H0 
ATOM    305  H   MOL H   0     -22.812  23.040  25.046  1.00  0.00           H0 
ATOM    306  H   MOL H   0     -24.149  36.543  24.425  1.00  0.00           H0 
ATOM    307  H   MOL H   0     -21.285  16.040  18.111  1.00  0.00           H0 
ATOM    308  H   MOL H   0     -22.622  29.543  17.490  1.00  0.00           H0 
ATOM    309  H   MOL H   0     -21.697  22.978  21.284  1.00  0.00           H0 
ATOM    310  H   MOL H   0     -23.035  36.480  20.663  1.00  0.00           H0 
ATOM    311  H   MOL H   0     -20.170  15.978  14.349  1.00  0.00           H0 
ATOM    312  H   MOL H   0     -21.507  29.481  13.727  1.00  0.00           H0 
ATOM    313  H   MOL H   0     -15.207  17.308  22.446  1.00  0.00           H0 
ATOM    314  H   MOL H   0     -24.611  16.252  19.748  1.00  0.00           H0 
ATOM    315  H   MOL H   0     -16.545  30.811  21.825  1.00  0.00           H0 
ATOM    316  H   MOL H   0     -25.948  29.755  19.127  1.00  0.00           H0 
ATOM    317  H   MOL H   0     -15.017  23.811  14.889  1.00  0.00           H0 
ATOM    318  H   MOL H   0     -24.421  22.755  12.192  1.00  0.00           H0 
ATOM    319  H   MOL H   0     -16.355  37.314  14.268  1.00  0.00           H0 
ATOM    320  H   MOL H   0     -25.759  36.258  11.570  1.00  0.00           H0 
ATOM    321  H   MOL H   0     -18.652  17.184  27.161  1.00  0.00           H0 
ATOM    322  H   MOL H   0     -28.056  16.128  24.464  1.00  0.00           H0 
ATOM    323  H   MOL H   0     -19.989  30.687  26.540  1.00  0.00           H0 
ATOM    324  H   MOL H   0     -29.393  29.631  23.842  1.00  0.00           H0 
ATOM    325  H   MOL H   0     -18.462  23.687  19.604  1.00  0.00           H0 
ATOM    326  H   MOL H   0     -27.866  22.631  16.907  1.00  0.00           H0 
ATOM    327  H   MOL H   0     -19.799  37.190  18.983  1.00  0.00           H0 
ATOM    328  H   MOL H   0     -29.203  36.134  16.285  1.00  0.00           H0 
ATOM    329  H   MOL H   0     -23.885  22.022  25.566  1.00  0.00           H0 
ATOM    330  H   MOL H   0     -25.223  35.525  24.944  1.00  0.00           H0 
ATOM    331  H   MOL H   0     -22.358  15.022  18.630  1.00  0.00           H0 
ATOM    332  H   MOL H   0     -23.695  28.525  18.009  1.00  0.00           H0 
ATOM    333  H   MOL H   0     -20.441  22.146  20.850  1.00  0.00           H0 
ATOM    334  H   MOL H   0     -21.778  35.649  20.229  1.00  0.00           H0 
ATOM    335  H   MOL H   0     -18.913  15.146  13.915  1.00  0.00           H0 
ATOM    336  H   MOL H   0     -20.251  28.649  13.294  1.00  0.00           H0 
ATOM    337  H   MOL H   0     -16.560  17.831  23.041  1.00  0.00           H0 
ATOM    338  H   MOL H   0     -25.964  16.776  20.343  1.00  0.00           H0 
ATOM    339  H   MOL H   0     -17.897  31.334  22.419  1.00  0.00           H0 
ATOM    340  H   MOL H   0     -27.301  30.278  19.722  1.00  0.00           H0 
ATOM    341  H   MOL H   0     -16.370  24.334  15.484  1.00  0.00           H0 
ATOM    342  H   MOL H   0     -25.774  23.279  12.786  1.00  0.00           H0 
ATOM    343  H   MOL H   0     -17.707  37.837  14.862  1.00  0.00           H0 
ATOM    344  H   MOL H   0     -27.111  36.781  12.165  1.00  0.00           H0 
ATOM    345  H   MOL H   0     -17.422  17.905  26.510  1.00  0.00           H0 
ATOM    346  H   MOL H   0     -26.826  16.850  23.812  1.00  0.00           H0 
ATOM    347  H   MOL H   0     -18.760  31.408  25.888  1.00  0.00           H0 
ATOM    348  H   MOL H   0     -28.164  30.353  23.190  1.00  0.00           H0 
ATOM    349  H   MOL H   0     -17.232  24.408  18.953  1.00  0.00           H0 
ATOM    350  H   MOL H   0     -26.636  23.353  16.255  1.00  0.00           H0 
ATOM    351  H   MOL H   0     -18.570  37.911  18.331  1.00  0.00           H0 
ATOM    352  H   MOL H   0     -27.974  36.856  15.634  1.00  0.00           H0 
ATOM    353  H   MOL H   0     -22.532  21.499  24.971  1.00  0.00           H0 
ATOM    354  H   MOL H   0     -23.870  35.002  24.350  1.00  0.00           H0 
ATOM    355  H   MOL H   0     -21.005  14.499  18.036  1.00  0.00           H0 
ATOM    356  H   MOL H   0     -22.342  28.002  17.414  1.00  0.00           H0 
ATOM    357  H   MOL H   0     -21.670  21.424  21.502  1.00  0.00           H0 
ATOM    358  H   MOL H   0     -23.008  34.927  20.881  1.00  0.00           H0 
ATOM    359  H   MOL H   0     -20.143  14.424  14.567  1.00  0.00           H0 
ATOM    360  H   MOL H   0     -21.480  27.927  13.945  1.00  0.00           H0 
ATOM    361  H   MOL H   0     -14.420  18.449  25.739  1.00  0.00           H0 
ATOM    362  H   MOL H   0     -23.824  17.393  23.041  1.00  0.00           H0 
ATOM    363  H   MOL H   0     -15.757  31.952  25.117  1.00  0.00           H0 
ATOM    364  H   MOL H   0     -25.161  30.896  22.420  1.00  0.00           H0 
ATOM    365  H   MOL H   0     -14.230  24.952  18.182  1.00  0.00           H0 
ATOM    366  H   MOL H   0     -23.634  23.896  15.484  1.00  0.00           H0 
ATOM    367  H   MOL H   0     -15.567  38.455  17.560  1.00  0.00           H0 
ATOM    368  H   MOL H   0     -24.971  37.399  14.863  1.00  0.00           H0 
ATOM    369  H   MOL H   0     -19.618  17.844  23.786  1.00  0.00           H0 
ATOM    370  H   MOL H   0     -29.022  16.788  21.088  1.00  0.00           H0 
ATOM    371  H   MOL H   0     -20.955  31.347  23.165  1.00  0.00           H0 
ATOM    372  H   MOL H   0     -30.359  30.291  20.467  1.00  0.00           H0 
ATOM    373  H   MOL H   0     -19.428  24.347  16.229  1.00  0.00           H0 
ATOM    374  H   MOL H   0     -28.832  23.291  13.531  1.00  0.00           H0 
ATOM    375  H   MOL H   0     -20.765  37.850  15.608  1.00  0.00           H0 
ATOM    376  H   MOL H   0     -30.169  36.794  12.910  1.00  0.00           H0 
ATOM    377  H   MOL H   0     -24.673  20.881  22.273  1.00  0.00           H0 
ATOM    378  H   MOL H   0     -26.010  34.384  21.652  1.00  0.00           H0 
ATOM    379  H   MOL H   0     -23.146  13.881  15.338  1.00  0.00           H0 
ATOM    380  H   MOL H   0     -24.483  27.384  14.716  1.00  0.00           H0 
ATOM    381  H   MOL H   0     -19.475  21.486  24.226  1.00  0.00           H0 
ATOM    382  H   MOL H   0     -20.812  34.989  23.604  1.00  0.00           H0 
ATOM    383  H   MOL H   0     -17.947  14.486  17.290  1.00  0.00           H0 
ATOM    384  H   MOL H   0     -19.285  27.989  16.669  1.00  0.00           H0 
ATOM    385  H   MOL H   0     -15.259  19.190  24.642  1.00  0.00           H0 
ATOM    386  H   MOL H   0     -24.663  18.134  21.944  1.00  0.00           H0 
ATOM    387  H   MOL H   0     -16.596  32.692  24.021  1.00  0.00           H0 
ATOM    388  H   MOL H   0     -26.000  31.637  21.323  1.00  0.00           H0 
ATOM    389  H   MOL H   0     -15.069  25.693  17.085  1.00  0.00           H0 
ATOM    390  H   MOL H   0     -24.473  24.637  14.387  1.00  0.00           H0 
ATOM    391  H   MOL H   0     -16.406  39.196  16.464  1.00  0.00           H0 
ATOM    392  H   MOL H   0     -25.810  38.140  13.766  1.00  0.00           H0 
ATOM    393  H   MOL H   0     -18.950  18.831  24.803  1.00  0.00           H0 
ATOM    394  H   MOL H   0     -28.354  17.776  22.105  1.00  0.00           H0 
ATOM    395  H   MOL H   0     -20.287  32.334  24.182  1.00  0.00           H0 
ATOM    396  H   MOL H   0     -29.691  31.279  21.484  1.00  0.00           H0 
ATOM    397  H   MOL H   0     -18.760  25.334  17.246  1.00  0.00           H0 
ATOM    398  H   MOL H   0     -28.164  24.279  14.548  1.00  0.00           H0 
ATOM    399  H   MOL H   0     -20.097  38.837  16.625  1.00  0.00           H0 
ATOM    400  H   MOL H   0     -29.501  37.782  13.927  1.00  0.00           H0 
ATOM    401  H   MOL H   0     -23.834  20.140  23.370  1.00  0.00           H0 
ATOM    402  H   MOL H   0     -25.171  33.643  22.748  1.00  0.00           H0 
ATOM    403  H   MOL H   0     -22.306  13.140  16.434  1.00  0.00           H0 
ATOM    404  H   MOL H   0     -23.644  26.643  15.813  1.00  0.00           H0 
ATOM    405  H   MOL H   0     -20.143  20.498  23.209  1.00  0.00           H0 
ATOM    406  H   MOL H   0     -21.480  34.001  22.587  1.00  0.00           H0 
ATOM    407  H   MOL H   0     -18.616  13.498  16.273  1.00  0.00           H0 
ATOM    408  H   MOL H   0     -19.953  27.001  15.652  1.00  0.00           H0 
ATOM    409  H   MOL H   0     -14.069  20.264  22.915  1.00  0.00           H0 
ATOM    410  H   MOL H   0     -23.473  19.208  20.218  1.00  0.00           H0 
ATOM    411  H   MOL H   0     -15.407  33.767  22.294  1.00  0.00           H0 
ATOM    412  H   MOL H   0     -24.811  32.711  19.596  1.00  0.00           H0 
ATOM    413  H   MOL H   0     -13.879  26.767  15.359  1.00  0.00           H0 
ATOM    414  H   MOL H   0     -23.283  25.711  12.661  1.00  0.00           H0 
ATOM    415  H   MOL H   0     -15.217  40.270  14.737  1.00  0.00           H0 
ATOM    416  H   MOL H   0     -24.621  39.214  12.039  1.00  0.00           H0 
ATOM    417  H   MOL H   0     -20.342  19.804  26.436  1.00  0.00           H0 
ATOM    418  H   MOL H   0     -29.746  18.749  23.738  1.00  0.00           H0 
ATOM    419  H   MOL H   0     -21.679  33.307  25.814  1.00  0.00           H0 
ATOM    420  H   MOL H   0     -31.083  32.252  23.116  1.00  0.00           H0 
ATOM    421  H   MOL H   0     -20.152  26.307  18.879  1.00  0.00           H0 
ATOM    422  H   MOL H   0     -29.556  25.252  16.181  1.00  0.00           H0 
ATOM    423  H   MOL H   0     -21.489  39.810  18.257  1.00  0.00           H0 
ATOM    424  H   MOL H   0     -30.893  38.755  15.560  1.00  0.00           H0 
ATOM    425  H   MOL H   0     -25.023  19.066  25.096  1.00  0.00           H0 
ATOM    426  H   MOL H   0     -26.360  32.569  24.475  1.00  0.00           H0 
ATOM    427  H   MOL H   0     -23.496  12.066  18.161  1.00  0.00           H0 
ATOM    428  H   MOL H   0     -24.833  25.569  17.540  1.00  0.00           H0 
ATOM    429  H   MOL H   0     -18.750  19.525  21.576  1.00  0.00           H0 
ATOM    430  H   MOL H   0     -20.088  33.028  20.955  1.00  0.00           H0 
ATOM    431  H   MOL H   0     -17.223  12.525  14.641  1.00  0.00           H0 
ATOM    432  H   MOL H   0     -18.561  26.028  14.019  1.00  0.00           H0 
ATOM    433  H   MOL H   0     -12.146  20.633  21.687  1.00  0.00           H0 
ATOM    434  H   MOL H   0     -21.550  19.577  18.989  1.00  0.00           H0 
ATOM    435  H   MOL H   0     -13.484  34.136  21.066  1.00  0.00           H0 
ATOM    436  H   MOL H   0     -22.888  33.080  18.368  1.00  0.00           H0 
ATOM    437  H   MOL H   0     -11.956  27.136  14.130  1.00  0.00           H0 
ATOM    438  H   MOL H   0     -21.360  26.080  11.433  1.00  0.00           H0 
ATOM    439  H   MOL H   0     -13.294  40.639  13.509  1.00  0.00           H0 
ATOM    440  H   MOL H   0     -22.698  39.583  10.811  1.00  0.00           H0 
ATOM    441  H   MOL H   0     -22.311  19.900  27.642  1.00  0.00           H0 
ATOM    442  H   MOL H   0     -31.715  18.844  24.945  1.00  0.00           H0 
ATOM    443  H   MOL H   0     -23.648  33.403  27.021  1.00  0.00           H0 
ATOM    444  H   MOL H   0     -33.052  32.347  24.323  1.00  0.00           H0 
ATOM    445  H   MOL H   0     -22.121  26.403  20.085  1.00  0.00           H0 
ATOM    446  H   MOL H   0     -31.525  25.347  17.388  1.00  0.00           H0 
ATOM    447  H   MOL H   0     -23.458  39.906  19.464  1.00  0.00           H0 
ATOM    448  H   MOL H   0     -32.862  38.850  16.766  1.00  0.00           H0 
ATOM    449  H   MOL H   0     -26.946  18.697  26.325  1.00  0.00           H0 
ATOM    450  H   MOL H   0     -28.283  32.200  25.703  1.00  0.00           H0 
ATOM    451  H   MOL H   0     -25.419  11.697  19.389  1.00  0.00           H0 
ATOM    452  H   MOL H   0     -26.756  25.200  18.768  1.00  0.00           H0 
ATOM    453  H   MOL H   0     -16.781  19.430  20.369  1.00  0.00           H0 
ATOM    454  H   MOL H   0     -18.119  32.933  19.748  1.00  0.00           H0 
ATOM    455  H   MOL H   0     -15.254  12.430  13.434  1.00  0.00           H0 
ATOM    456  H   MOL H   0     -16.592  25.933  12.813  1.00  0.00           H0 
ATOM    457  H   MOL H   0     -10.274  19.346  22.070  1.00  0.00           H0 
ATOM    458  H   MOL H   0     -19.678  18.291  19.373  1.00  0.00           H0 
ATOM    459  H   MOL H   0     -11.611  32.849  21.449  1.00  0.00           H0 
ATOM    460  H   MOL H   0     -21.015  31.794  18.751  1.00  0.00           H0 
ATOM    461  H   MOL H   0     -10.084  25.849  14.514  1.00  0.00           H0 
ATOM    462  H   MOL H   0     -19.488  24.794  11.816  1.00  0.00           H0 
ATOM    463  H   MOL H   0     -11.421  39.352  13.892  1.00  0.00           H0 
ATOM    464  H   MOL H   0     -20.825  38.297  11.194  1.00  0.00           H0 
ATOM    465  H   MOL H   0     -23.892  18.243  27.395  1.00  0.00           H0 
ATOM    466  H   MOL H   0     -33.296  17.187  24.697  1.00  0.00           H0 
ATOM    467  H   MOL H   0     -25.229  31.746  26.773  1.00  0.00           H0 
ATOM    468  H   MOL H   0     -34.633  30.690  24.075  1.00  0.00           H0 
ATOM    469  H   MOL H   0     -23.702  24.746  19.838  1.00  0.00           H0 
ATOM    470  H   MOL H   0     -33.106  23.690  17.140  1.00  0.00           H0 
ATOM    471  H   MOL H   0     -25.039  38.249  19.216  1.00  0.00           H0 
ATOM    472  H   MOL H   0     -34.443  37.193  16.519  1.00  0.00           H0 
ATOM    473  H   MOL H   0     -28.818  19.983  25.941  1.00  0.00           H0 
ATOM    474  H   MOL H   0     -30.156  33.486  25.320  1.00  0.00           H0 
ATOM    475  H   MOL H   0     -27.291  12.983  19.006  1.00  0.00           H0 
ATOM    476  H   MOL H   0     -28.628  26.486  18.384  1.00  0.00           H0 
ATOM    477  H   MOL H   0     -15.201  21.087  20.617  1.00  0.00           H0 
ATOM    478  H   MOL H   0     -16.538  34.590  19.996  1.00  0.00           H0 
ATOM    479  H   MOL H   0     -13.673  14.087  13.682  1.00  0.00           H0 
ATOM    480  H   MOL H   0     -15.011  27.590  13.060  1.00  0.00           H0 
ATOM    481  H   MOL H   0     -10.332  17.697  23.675  1.00  0.00           H0 
ATOM    482  H   MOL H   0     -19.736  16.641  20.977  1.00  0.00           H0 
ATOM    483  H   MOL H   0     -11.669  31.200  23.054  1.00  0.00           H0 
ATOM    484  H   MOL H   0     -21.073  30.144  20.356  1.00  0.00           H0 
ATOM    485  H   MOL H   0     -10.142  24.200  16.118  1.00  0.00           H0 
ATOM    486  H   MOL H   0     -19.546  23.144  13.421  1.00  0.00           H0 
ATOM    487  H   MOL H   0     -11.479  37.703  15.497  1.00  0.00           H0 
ATOM    488  H   MOL H   0     -20.883  36.647  12.799  1.00  0.00           H0 
ATOM    489  H   MOL H   0     -23.498  16.497  25.946  1.00  0.00           H0 
ATOM    490  H   MOL H   0     -32.902  15.442  23.248  1.00  0.00           H0 
ATOM    491  H   MOL H   0     -24.835  30.000  25.325  1.00  0.00           H0 
ATOM    492  H   MOL H   0     -34.239  28.945  22.627  1.00  0.00           H0 
ATOM    493  H   MOL H   0     -23.308  23.000  18.389  1.00  0.00           H0 
ATOM    494  H   MOL H   0     -32.712  21.945  15.691  1.00  0.00           H0 
ATOM    495  H   MOL H   0     -24.645  36.503  17.768  1.00  0.00           H0 
ATOM    496  H   MOL H   0     -34.049  35.448  15.070  1.00  0.00           H0 
ATOM    497  H   MOL H   0     -28.761  21.633  24.337  1.00  0.00           H0 
ATOM    498  H   MOL H   0     -30.098  35.136  23.715  1.00  0.00           H0 
ATOM    499  H   MOL H   0     -27.234  14.633  17.401  1.00  0.00           H0 
ATOM    500  H   MOL H   0     -28.571  28.136  16.780  1.00  0.00           H0 
ATOM    501  H   MOL H   0     -15.594  22.832  22.066  1.00  0.00           H0 
ATOM    502  H   MOL H   0     -16.932  36.335  21.444  1.00  0.00           H0 
ATOM    503  H   MOL H   0     -14.067  15.832  15.130  1.00  0.00           H0 
ATOM    504  H   MOL H   0     -15.405  29.335  14.509  1.00  0.00           H0 
ATOM    505  H   MOL H   0     -12.252  17.301  24.873  1.00  0.00           H0 
ATOM    506  H   MOL H   0     -21.656  16.245  22.175  1.00  0.00           H0 
ATOM    507  H   MOL H   0     -13.590  30.804  24.252  1.00  0.00           H0 
ATOM    508  H   MOL H   0     -22.994  29.748  21.554  1.00  0.00           H0 
ATOM    509  H   MOL H   0     -12.062  23.804  17.316  1.00  0.00           H0 
ATOM    510  H   MOL H   0     -21.466  22.748  14.618  1.00  0.00           H0 
ATOM    511  H   MOL H   0     -13.400  37.307  16.695  1.00  0.00           H0 
ATOM    512  H   MOL H   0     -22.804  36.251  13.997  1.00  0.00           H0 
ATOM    513  H   MOL H   0     -21.526  16.378  24.772  1.00  0.00           H0 
ATOM    514  H   MOL H   0     -30.930  15.322  22.074  1.00  0.00           H0 
ATOM    515  H   MOL H   0     -22.864  29.881  24.151  1.00  0.00           H0 
ATOM    516  H   MOL H   0     -32.268  28.825  21.453  1.00  0.00           H0 
ATOM    517  H   MOL H   0     -21.336  22.881  17.215  1.00  0.00           H0 
ATOM    518  H   MOL H   0     -30.740  21.825  14.517  1.00  0.00           H0 
ATOM    519  H   MOL H   0     -22.674  36.384  16.594  1.00  0.00           H0 
ATOM    520  H   MOL H   0     -32.078  35.328  13.896  1.00  0.00           H0 
ATOM    521  H   MOL H   0     -26.840  22.029  23.139  1.00  0.00           H0 
ATOM    522  H   MOL H   0     -28.178  35.532  22.517  1.00  0.00           H0 
ATOM    523  H   MOL H   0     -25.313  15.029  16.203  1.00  0.00           H0 
ATOM    524  H   MOL H   0     -26.650  28.532  15.582  1.00  0.00           H0 
ATOM    525  H   MOL H   0     -17.566  22.952  23.240  1.00  0.00           H0 
ATOM    526  H   MOL H   0     -18.904  36.455  22.618  1.00  0.00           H0 
ATOM    527  H   MOL H   0     -16.039  15.952  16.304  1.00  0.00           H0 
ATOM    528  H   MOL H   0     -17.376  29.455  15.683  1.00  0.00           H0 
ATOM    529  N   MOL H   0     -15.495  13.698  25.207  1.00  0.00           N0 
ATOM    530  N   MOL H   0     -24.899  12.642  22.509  1.00  0.00           N0 
ATOM    531  N   MOL H   0     -16.832  27.201  24.586  1.00  0.00           N0 
ATOM    532  N   MOL H   0     -26.236  26.145  21.888  1.00  0.00           N0 
ATOM    533  N   MOL H   0     -15.305  20.201  17.650  1.00  0.00           N0 
ATOM    534  N   MOL H   0     -24.709  19.145  14.953  1.00  0.00           N0 
ATOM    535  N   MOL H   0     -16.642  33.704  17.029  1.00  0.00           N0 
ATOM    536  N   MOL H   0     -26.046  32.648  14.331  1.00  0.00           N0 
ATOM    537  N   MOL H   0     -17.638  13.464  24.738  1.00  0.00           N0 
ATOM    538  N   MOL H   0     -27.042  12.408  22.040  1.00  0.00           N0 
ATOM    539  N   MOL H   0     -18.975  26.967  24.116  1.00  0.00           N0 
ATOM    540  N   MOL H   0     -28.379  25.911  21.419  1.00  0.00           N0 
ATOM    541  N   MOL H   0     -17.448  19.967  17.181  1.00  0.00           N0 
ATOM    542  N   MOL H   0     -26.852  18.911  14.483  1.00  0.00           N0 
ATOM    543  N   MOL H   0     -18.785  33.470  16.559  1.00  0.00           N0 
ATOM    544  N   MOL H   0     -28.189  32.414  13.862  1.00  0.00           N0 
ATOM    545  N   MOL H   0     -23.597  25.632  22.805  1.00  0.00           N0 
ATOM    546  N   MOL H   0     -24.935  39.135  22.183  1.00  0.00           N0 
ATOM    547  N   MOL H   0     -22.070  18.632  15.869  1.00  0.00           N0 
ATOM    548  N   MOL H   0     -23.408  32.135  15.248  1.00  0.00           N0 
ATOM    549  N   MOL H   0     -21.454  25.866  23.274  1.00  0.00           N0 
ATOM    550  N   MOL H   0     -22.792  39.369  22.653  1.00  0.00           N0 
ATOM    551  N   MOL H   0     -19.927  18.866  16.339  1.00  0.00           N0 
ATOM    552  N   MOL H   0     -21.264  32.369  15.717  1.00  0.00           N0 
ATOM    553  N   MOL H   0     -15.285  17.196  24.434  1.00  0.00           N0 
ATOM    554  N   MOL H   0     -24.688  16.141  21.736  1.00  0.00           N0 
ATOM    555  N   MOL H   0     -16.622  30.699  23.813  1.00  0.00           N0 
ATOM    556  N   MOL H   0     -26.026  29.644  21.115  1.00  0.00           N0 
ATOM    557  N   MOL H   0     -15.095  23.699  16.877  1.00  0.00           N0 
ATOM    558  N   MOL H   0     -24.499  22.644  14.180  1.00  0.00           N0 
ATOM    559  N   MOL H   0     -16.432  37.202  16.256  1.00  0.00           N0 
ATOM    560  N   MOL H   0     -25.836  36.147  13.558  1.00  0.00           N0 
ATOM    561  N   MOL H   0     -18.536  16.909  25.191  1.00  0.00           N0 
ATOM    562  N   MOL H   0     -27.940  15.854  22.493  1.00  0.00           N0 
ATOM    563  N   MOL H   0     -19.874  30.412  24.570  1.00  0.00           N0 
ATOM    564  N   MOL H   0     -29.278  29.357  21.872  1.00  0.00           N0 
ATOM    565  N   MOL H   0     -18.346  23.412  17.634  1.00  0.00           N0 
ATOM    566  N   MOL H   0     -27.750  22.357  14.936  1.00  0.00           N0 
ATOM    567  N   MOL H   0     -19.684  36.915  17.013  1.00  0.00           N0 
ATOM    568  N   MOL H   0     -29.088  35.860  14.315  1.00  0.00           N0 
ATOM    569  N   MOL H   0     -23.808  22.133  23.578  1.00  0.00           N0 
ATOM    570  N   MOL H   0     -25.145  35.636  22.956  1.00  0.00           N0 
ATOM    571  N   MOL H   0     -22.281  15.133  16.642  1.00  0.00           N0 
ATOM    572  N   MOL H   0     -23.618  28.636  16.021  1.00  0.00           N0 
ATOM    573  N   MOL H   0     -20.556  22.421  22.821  1.00  0.00           N0 
ATOM    574  N   MOL H   0     -21.894  35.923  22.199  1.00  0.00           N0 
ATOM    575  N   MOL H   0     -19.029  15.421  15.885  1.00  0.00           N0 
ATOM    576  N   MOL H   0     -20.366  28.924  15.264  1.00  0.00           N0 
ATOM    577  O   MOL H   0     -14.374  16.141  26.223  1.00  0.00           O0 
ATOM    578  O   MOL H   0     -23.778  15.085  23.525  1.00  0.00           O0 
ATOM    579  O   MOL H   0     -15.711  29.644  25.602  1.00  0.00           O0 
ATOM    580  O   MOL H   0     -25.115  28.588  22.904  1.00  0.00           O0 
ATOM    581  O   MOL H   0     -14.184  22.644  18.666  1.00  0.00           O0 
ATOM    582  O   MOL H   0     -23.588  21.588  15.968  1.00  0.00           O0 
ATOM    583  O   MOL H   0     -15.521  36.147  18.045  1.00  0.00           O0 
ATOM    584  O   MOL H   0     -24.925  35.091  15.347  1.00  0.00           O0 
ATOM    585  O   MOL H   0     -19.207  15.538  23.514  1.00  0.00           O0 
ATOM    586  O   MOL H   0     -28.610  14.482  20.816  1.00  0.00           O0 
ATOM    587  O   MOL H   0     -20.544  29.040  22.893  1.00  0.00           O0 
ATOM    588  O   MOL H   0     -29.948  27.985  20.195  1.00  0.00           O0 
ATOM    589  O   MOL H   0     -19.017  22.041  15.957  1.00  0.00           O0 
ATOM    590  O   MOL H   0     -28.420  20.985  13.259  1.00  0.00           O0 
ATOM    591  O   MOL H   0     -20.354  35.544  15.336  1.00  0.00           O0 
ATOM    592  O   MOL H   0     -29.758  34.488  12.638  1.00  0.00           O0 
ATOM    593  O   MOL H   0     -24.719  23.189  21.789  1.00  0.00           O0 
ATOM    594  O   MOL H   0     -26.056  36.692  21.167  1.00  0.00           O0 
ATOM    595  O   MOL H   0     -23.191  16.189  14.853  1.00  0.00           O0 
ATOM    596  O   MOL H   0     -24.529  29.692  14.232  1.00  0.00           O0 
ATOM    597  O   MOL H   0     -19.886  23.792  24.498  1.00  0.00           O0 
ATOM    598  O   MOL H   0     -21.223  37.295  23.876  1.00  0.00           O0 
ATOM    599  O   MOL H   0     -18.359  16.792  17.562  1.00  0.00           O0 
ATOM    600  O   MOL H   0     -19.696  30.295  16.941  1.00  0.00           O0 
TER
